# Supplementary material
Source: publisher figshare collection journal article supplement (https://diabetesjournals.figshare.com/articles/dataset/_/11956509)
Supplement: Supplementary file 5 [file 1]

“Role of Continuous Glucose Monitoring in Diabetes Treatment” is published by the American Diabetes Association, 2451 Crystal Drive, Arlington, VA 22202. Contact: 1-800-DIABETES, professional.diabetes.org

The opinions expressed are those of the authors and do not necessarily reflect those of Abbott Diabetes Care or the American Diabetes Association. The content was developed by the authors and does not represent the policy or position of the American Diabetes Association, any of its boards or committees, or any of its journals or their editors or editorial boards.

© 2018 by American Diabetes Association.

All rights reserved. None of the contents may be reproduced without the written permission of the American Diabetes Association.

### **Dualities of Interest**

*I.B.H. has served as a consultant to Abbott Diabetes Care, Adocia, Bigfoot, and Roche. His institution has received research grant support from Medtronic.*

*T.B. has served on advisory boards of Bayer Health Care, Boehringer Ingelheim, DreaMed Diabetes, Eli Lilly, Medtronic, Novo Nordisk, and Sanofi. His institution has received research grant support, with receipt of travel and accommodation expenses in some cases, from Abbott Diabetes Care, Diamyd, GluSense, Medtronic, Novo Nordisk, Sandoz, and Sanofi. He has received honoraria for participating on the speakers bureaus of Bayer Health Care, Eli Lilly, Medtronic, Novo Nordisk, Roche, and Sanofi. He owns stock in DreaMed Diabetes.*

*A.L.P. has served on advisory boards for Abbott Diabetes Care, Becton Dickinson, Bigfoot, Boehringer Ingelheim, Eli Lilly, Lexicon, Livongo, Medscape, Merck, Novo Nordisk, OptumHealth, Sanofi, and Science 37. She has received research grant support from Dexcom and Mannkind. She participates on a speakers bureau for Novo Nordisk.*

*J.J.C. participates in speakers bureaus for Janssen, Merck, Novo Nordisk, and Sanofi.*

*G.A. has served as a consultant and on a steering committee for Dexcom and on an advisory board for Novo Nordisk, and her institution has received research grant support from AstraZeneca and Novo Nordisk.*

*R.M.B.'s institution has received payment for his services as a research investigator, consultant, or advisory board member for Abbott Diabetes Care, Becton Dickinson, Boehringer Ingelheim, Bristol-Myers Squibb/AstraZeneca, Dexcom, Eli Lilly, Hygieia, Johnson & Johnson, Medtronic, Merck, Novo Nordisk, Roche, Sanofi, and Takeda. R.M.B. has inherited Merck stock, volunteers for the American Diabetes Association and JDRF, and receives funding from the National Institutes of Health for diabetes technology research.*

# TABLE OF CONTENTS

- 1 | Introduction: History of Glucose Monitoring  
Irl B. Hirsch, MD, University of Washington, Seattle, WA
- 2 | Continuous Glucose Monitoring Comes of Age  
Tadej Battelino, MD, PhD, University of Ljubljana, Ljubljana, Slovenia
- 3 | The Evidence Base for Continuous Glucose Monitoring  
Anne L. Peters, MD, Keck School of Medicine of the University of Southern California, Los Angeles, CA
- 8 | Continuous Glucose Monitoring Systems: Categories and Features  
James J. Chamberlain, MD, St. Mark's Hospital and St. Mark's Diabetes Center, Salt Lake City, UT
- 11 | Patient Selection for Continuous Glucose Monitoring  
James J. Chamberlain, MD, St. Mark's Hospital and St. Mark's Diabetes Center, Salt Lake City, UT
- 13 | Approaches for Successful Outcomes with Continuous Glucose Monitoring  
Grazia Aleppo, MD, FACE, FACP, Feinberg School of Medicine, Northwestern University, Chicago, IL
- 19 | Continuous Glucose Monitoring Data as an Adjunct to A1C  
Richard M. Bergenstal, MD, International Diabetes Center, Park Nicollet and HealthPartners, Minneapolis, MN
- 20 | Understanding Continuous Glucose Monitoring Data  
Richard M. Bergenstal, MD, International Diabetes Center, Park Nicollet and HealthPartners, Minneapolis, MN
- 24 | The Future of Continuous Glucose Monitoring  
Tadej Battelino, MD, PhD, University of Ljubljana, Ljubljana, Slovenia

### **Acknowledgments**

Writing support services for this compendium were provided by Carol Verderese of The Diabetes Education Group in Lakeville, CT. Editorial and project management services were provided by Debbie Kendall of Kendall Editorial in Richmond, VA.

### **Author Contributions**

All authors researched and wrote their respective section(s). Lead author I.B.H. reviewed all content and is the guarantor of this work.
