# Supplementary material
Source: publisher figshare collection journal article supplement (https://diabetesjournals.figshare.com/articles/dataset/_/11956509)
Supplement: Supplementary file 9 [file 1]

# The Evidence Base for Continuous Glucose Monitoring

Anne L. Peters, MD, Keck School of Medicine of the University of Southern California, Los Angeles, CA

Twenty-seven published randomized controlled trials (RCTs) assessing outcomes of continuous glucose monitoring (CGM), involving a total of 3,826 patients, have been published to date. Although the number of patients in each study has been small compared to drug trials, cumulative evidence indicates a benefit of CGM for patients treated with either continuous subcutaneous insulin infusion (CSII) or a multiple daily injection (MDI) insulin regimen. Additionally, some data suggest that CGM may benefit people with type 2 diabetes who do not use insulin therapy.

Overall, RCTs have shown improved glucose control in patients with higher initial A1Cs (often in the range of 7.8–8.8%) using CGM compared to self-monitoring of blood glucose (SMBG). People who wear their CGM device most consistently derive the most benefit. Time spent in the designated hypoglycemia range (usually <70 mg/dL) was reduced in some studies, particularly in those with patients selected for having a higher risk of hypoglycemia. These patients tended to have lower baseline A1Cs (in the range of 6.5–7.5%). Rates of severe hypoglycemia generally have not differed between CGM and non-CGM groups, and these rates have been low across all studies.

Studies fall into a few basic categories: adults with type 1 diabetes (8 trials, 698 patients), adults with type 2 diabetes (4 trials, 547 patients), children with type 1 diabetes (2 trials, 227 patients), adults plus children with type 1 diabetes (7 trials, 1,084 patients), adults with type 1 or type 2 diabetes (3 trials, 655 patients), and women during pregnancy with either type 1 diabetes or gestational diabetes mellitus (GDM) (3 trials, 585 patients). Table 1 lists general findings from all of these trials. It is important to note that some trials used A1C or time in

range as the primary endpoint, whereas others used time in a hypoglycemic range as the primary outcome. Readers should also be aware that Table 1 is not a meta-analysis per se, but rather includes studies identified through a literature search of PubMed and Ovid MEDLINE, as well as all prior reviews and studies in their reference lists. Only RCT data are included; observational studies and extension phases of RCTs also have been performed but are not represented here.

The first trials, from the early 2000s, used intermittent CGM. Some used “professional” CGM, in which patients were blinded to the CGM data (see the article on p. 8 of this compendium), and others followed an intermittent use schedule. As time progressed, the trials reflected evolving use of CGM to the current day. That is, earlier studies began to suggest that CGM could improve outcomes, but lack of access to real-time data limited benefit. More recent studies of real-time CGM, in which around-the-clock data are available, have shown more benefit in terms of reduction in both A1C and time spent in a hypoglycemic range.

A major impediment to interpreting CGM studies is that no uniform standard has been employed for teaching people with diabetes how to use continuous data, and no standard follow-up is provided to ensure that dose adjustments are made. In some trials, written instructions were provided to patients regarding insulin dose adjustments, but in many others, targeted education was not provided beyond how to use the device. Additionally, rapid advances in technology are not well represented in the literature, although data from newer systems, such as the Dexcom G5 Mobile (Dexcom, San Diego, CA) and the FreeStyle Libre (Abbott, Alameda, CA), are becoming available.

**TABLE 1** Summary of CGM Research Studies

| Study                                | Design                                                                                                                                                                      | Primary Outcome / Type of CGM      | A1C Outcomes                             | Hypoglycemia Change/Other                                                                                                                               |
|--------------------------------------|-----------------------------------------------------------------------------------------------------------------------------------------------------------------------------|------------------------------------|------------------------------------------|---------------------------------------------------------------------------------------------------------------------------------------------------------|
| ADULTS WITH T1D: A1C PRIMARY OUTCOME |                                                                                                                                                                             |                                    |                                          |                                                                                                                                                         |
| Beck et al. (1,2)                    | <ul style="list-style-type: none"> <li>Adults with T1D on MDI</li> <li><math>n = 158</math></li> <li>Baseline A1C: ~8.6%</li> <li>Parallel arms, 24 weeks</li> </ul>        | A1C reduction / Dexcom G4 Platinum | –0.6%, $P < 0.001$                       | <ul style="list-style-type: none"> <li>Time &lt;70 mg/dL was 43 vs. 80 min/day, <math>P = 0.002</math></li> <li>No difference in severe lows</li> </ul> |
| Lind et al. (3)                      | <ul style="list-style-type: none"> <li>Adults with T1D on MDI</li> <li><math>n = 161</math></li> <li>Baseline A1C: 8.6%</li> <li>Crossover, 26-week arms</li> </ul>         | A1C reduction / Dexcom G4 Platinum | –0.43, $P < 0.001$                       | <ul style="list-style-type: none"> <li>Numerically less time in a hypoglycemic range with CGM</li> </ul>                                                |
| Sequeira et al. (4)                  | <ul style="list-style-type: none"> <li>Underserved adults with T1D MDI</li> <li><math>n = 25</math></li> <li>Baseline A1C: 8.5%</li> <li>Crossover, 28-week arms</li> </ul> | A1C reduction / Dexcom SEVEN       | No significant difference between groups | <ul style="list-style-type: none"> <li>No change in rates of hypoglycemia</li> </ul>                                                                    |

continued on page 4

| Study                                                           | Design                                                                                                                                                                                                                                                                                                                                                                                                                      | Primary Outcome / Type of CGM                                                                                                           | A1C Outcomes                                                                                                                                                                                                                                                         | Hypoglycemia Change/Other                                                                                                                                                                                                                                                                                                                                                  |
|-----------------------------------------------------------------|-----------------------------------------------------------------------------------------------------------------------------------------------------------------------------------------------------------------------------------------------------------------------------------------------------------------------------------------------------------------------------------------------------------------------------|-----------------------------------------------------------------------------------------------------------------------------------------|----------------------------------------------------------------------------------------------------------------------------------------------------------------------------------------------------------------------------------------------------------------------|----------------------------------------------------------------------------------------------------------------------------------------------------------------------------------------------------------------------------------------------------------------------------------------------------------------------------------------------------------------------------|
| Tumminia et al. (5)                                             | <ul style="list-style-type: none"> <li>Adults with T1D on MDI or CSII</li> <li><math>n = 20</math></li> <li>Baseline A1C: ~8.65%</li> <li>Crossover, 24-week arms</li> </ul>                                                                                                                                                                                                                                                | A1C reduction / Medtronic Guardian REAL-Time                                                                                            | Only analyzed 14 patients who used CGM $\geq 40\%$ of the time; in these patients, there was a significant reduction in A1C ( $P < 0.05$ )                                                                                                                           | Risk for hypoglycemia was reduced (time spent $< 70$ mg/dL/day), $P < 0.05$                                                                                                                                                                                                                                                                                                |
| ADULTS WITH T1D: HYPOGLYCEMIA PRIMARY OUTCOME                   |                                                                                                                                                                                                                                                                                                                                                                                                                             |                                                                                                                                         |                                                                                                                                                                                                                                                                      |                                                                                                                                                                                                                                                                                                                                                                            |
| Bolinder et al. (6)                                             | <ul style="list-style-type: none"> <li>Adults with T1D on MDI or CSII</li> <li><math>n = 241</math></li> <li>Baseline A1C: 6.7%</li> <li>Parallel arms, 6 months</li> </ul>                                                                                                                                                                                                                                                 | Change in time in hypoglycemic range ( $< 70$ mg/dL) / Abbott FreeStyle Libre                                                           | NS                                                                                                                                                                                                                                                                   | <ul style="list-style-type: none"> <li>Overall, 38% reduction in time in hypoglycemia (<math>-1.24</math> hours/day, <math>P &lt; 0.0001</math>)</li> <li>Time in range (3.9–10.0 mmol/L [70–180 mg/dL]; mean difference) improved by <math>1.0 \pm 0.30</math> hour, <math>P = 0.0006</math></li> </ul>                                                                   |
| Hermanns et al. (7)                                             | <ul style="list-style-type: none"> <li>Adults with T1D, most on MDI</li> <li><math>n = 41</math></li> <li>Baseline A1C: 8.2%</li> <li>Crossover design, 5-day arms; patients were free-living within inpatient research setting</li> </ul>                                                                                                                                                                                  | Proportion of time spent hypoglycemic / Dexcom SEVEN PLUS                                                                               | N/A                                                                                                                                                                                                                                                                  | Reduction in time in hypoglycemic range: $125 \pm 89$ vs. $181 \pm 125$ min/day, $P = 0.005$                                                                                                                                                                                                                                                                               |
| van Beers et al. (8)                                            | <ul style="list-style-type: none"> <li>Adults with T1D on MDI or CSII with a Gold score <math>\geq 4</math></li> <li><math>n = 52</math></li> <li>Baseline A1C: 7.5%</li> <li>Crossover, 16-week arms</li> </ul>                                                                                                                                                                                                            | Mean difference in time in range (4–10 mmol/L [72–180 mg/dL]) / Medtronic Enlite with a MiniMed Paradigm Veo system (used as a monitor) | NS                                                                                                                                                                                                                                                                   | <ul style="list-style-type: none"> <li>Reductions in hypoglycemia (<math>\leq 3.9</math> mmol/L [70.2 mg/dL]) <math>-4.7\%</math>, <math>P &lt; 0.0001</math></li> <li>Severe hypoglycemia: 14 events with CGM vs. 34 events with SMBG, <math>P = 0.033</math></li> <li>Time in range (mean difference) improved by <math>9.6\%</math>, <math>P = 0.0001</math></li> </ul> |
| ADULTS AND CHILDREN WITH T1D: A1C/TIME IN RANGE PRIMARY OUTCOME |                                                                                                                                                                                                                                                                                                                                                                                                                             |                                                                                                                                         |                                                                                                                                                                                                                                                                      |                                                                                                                                                                                                                                                                                                                                                                            |
| Battelino et al. (9)                                            | <ul style="list-style-type: none"> <li>Adults and children with T1D on CSII</li> <li><math>n = 153</math></li> <li>Baseline A1C: 8.1% for adults, 8.6% for children</li> <li>Crossover, 6-month arms</li> </ul>                                                                                                                                                                                                             | A1C reduction / Medtronic Guardian REAL-Time                                                                                            | A1C difference $-0.43\%$ in favor of sensor on, $P < 0.001$                                                                                                                                                                                                          | <ul style="list-style-type: none"> <li>Time spent <math>&lt; 3.9</math> mmol/L (70.2 mg/dL) was 19 vs. 31 min/day, <math>P = 0.009</math></li> <li>Four severe hypoglycemic episodes in sensor on mode, two in sensor off mode</li> </ul>                                                                                                                                  |
| Deiss et al. (10)                                               | <ul style="list-style-type: none"> <li>Adults and children with T1D on MDI or CSII</li> <li><math>n = 156</math></li> <li>Baseline A1C: 9.5% in arm 1, 9.7% in arm 2</li> <li>Three parallel arms: continuous CGM (arm 1) vs. biweekly 3-day CGM (arm 2) vs. control for 3 months</li> </ul>                                                                                                                                | A1C reduction / Medtronic Guardian REAL-Time                                                                                            | Arm 1: $-0.6\%$ , $P = 0.003$ ; Arm 2: no difference in A1C                                                                                                                                                                                                          | One episode of severe hypoglycemia in each arm                                                                                                                                                                                                                                                                                                                             |
| JDRF CGM Study Group (11)                                       | <ul style="list-style-type: none"> <li>Adults and children with T1D on MDI or CSII</li> <li><math>n = 322</math></li> <li>Three age-groups: <math>\geq 25</math> years (<math>n = 98</math>), 15–24 years (<math>n = 110</math>), and 8–14 years (<math>n = 98</math>)</li> <li>Baseline A1C: <math>\geq 25</math> years, 7.6%; 15–24 years, 7.9–8.0%; and 8–14 years, 7.9–8.0%</li> <li>Parallel arms, 26 weeks</li> </ul> | A1C reduction / DexCom SEVEN, Medtronic MiniMed Paradigm REAL-Time insulin pump and CGMS, and Abbott FreeStyle Navigator                | <ul style="list-style-type: none"> <li>A1C difference: in those <math>\geq 25</math> years of age, <math>-0.53\%</math>, <math>P &lt; 0.001</math>; in those <math>&lt; 25</math> years of age, no difference</li> <li>A1C response related to use of CGM</li> </ul> | No difference in time spent in a hypoglycemic range or in number of severe hypoglycemic episodes                                                                                                                                                                                                                                                                           |

| Study                                                      | Design                                                                                                                                                                                                                                                                                          | Primary Outcome / Type of CGM                                                                                                   | A1C Outcomes                                                                                                                                                                                                              | Hypoglycemia Change/Other                                                                                                                                                                                                                                                                                                                                                                         |
|------------------------------------------------------------|-------------------------------------------------------------------------------------------------------------------------------------------------------------------------------------------------------------------------------------------------------------------------------------------------|---------------------------------------------------------------------------------------------------------------------------------|---------------------------------------------------------------------------------------------------------------------------------------------------------------------------------------------------------------------------|---------------------------------------------------------------------------------------------------------------------------------------------------------------------------------------------------------------------------------------------------------------------------------------------------------------------------------------------------------------------------------------------------|
| O'Connell et al. (12)                                      | <ul style="list-style-type: none"> <li>Adults and adolescents with T1D on CSII</li> <li><math>n = 55</math></li> <li>Baseline A1C 7.3% for intervention group, 7.5% for control group</li> <li>Parallel arms, 3 months</li> </ul>                                                               | Time in range during the 3-month study period / Medtronic MiniMed Paradigm REAL-Time insulin pump and CGMS                      | <ul style="list-style-type: none"> <li>No difference in primary outcome</li> <li>A1C was <math>-0.43\%</math> lower in the CGM group, <math>P = 0.009</math></li> <li>Greater reduction in group with more use</li> </ul> | No difference in time in range, variability, or hypoglycemia                                                                                                                                                                                                                                                                                                                                      |
| ADULTS AND CHILDREN WITH T1D: HYPOGLYCEMIA PRIMARY OUTCOME |                                                                                                                                                                                                                                                                                                 |                                                                                                                                 |                                                                                                                                                                                                                           |                                                                                                                                                                                                                                                                                                                                                                                                   |
| JDRF CGM Study Group (13)                                  | <ul style="list-style-type: none"> <li>Adults and children with T1D on MDI or CSII</li> <li><math>n = 129</math></li> <li>Baseline A1C: 6.4% for CGM group, 6.5% for control group</li> <li>Parallel arms, 26 weeks</li> </ul>                                                                  | Change in time $\leq 70$ mg/dL / DexCom SEVEN, MiniMed Paradigm REAL-Time insulin pump and CGMS, and Abbott FreeStyle Navigator | A1C treatment difference favoring CGM, $P < 0.001$                                                                                                                                                                        | <ul style="list-style-type: none"> <li>Time <math>\leq 70</math> mg/dL numerically less frequent (54 vs. 91 min/day) but not significant, <math>P = 0.16</math></li> <li>Median time with blood glucose <math>\leq 60</math> mg/dL was 18 vs. 35 min/day, <math>P = 0.05</math></li> <li>Severe hypoglycemia 10 and 11% for CGM and control groups, respectively, <math>P = 1.0</math></li> </ul> |
| Battelino et al. (14)                                      | <ul style="list-style-type: none"> <li>Adults and children with T1D on MDI or CSII</li> <li><math>n = 120</math></li> <li>Baseline A1C: 6.9%</li> <li>Parallel arms, 26 weeks</li> </ul>                                                                                                        | Time spent in hypoglycemic range / Abbott FreeStyle Navigator                                                                   | A1C treatment difference favoring CGM: $-0.27\%$ , $P = 0.008$                                                                                                                                                            | <ul style="list-style-type: none"> <li>Time spent <math>&lt; 63</math> mg/dL shorter in CGM group; ratio of means 0.49, <math>P = 0.03</math></li> <li>No severe hypoglycemia</li> </ul>                                                                                                                                                                                                          |
| Heinemann et al. (15)                                      | <ul style="list-style-type: none"> <li>Adults and children with T1D on MDI with a history of impaired hypoglycemia awareness or severe hypoglycemia</li> <li><math>n = 149</math></li> <li>Baseline A1C: 7.3% for control group, 7.6% for CGM group</li> <li>Parallel arms, 26 weeks</li> </ul> | Baseline-adjusted hypoglycemia events (glucose $\leq 3.0$ mmol/L [ $54$ mg/dL] for $\geq 20$ minutes) / Dexcom G5 Mobile        | No difference in A1C                                                                                                                                                                                                      | Adjusted between-group difference in low glucose events: 0.28, $P < 0.0001$                                                                                                                                                                                                                                                                                                                       |
| CHILDREN WITH T1D                                          |                                                                                                                                                                                                                                                                                                 |                                                                                                                                 |                                                                                                                                                                                                                           |                                                                                                                                                                                                                                                                                                                                                                                                   |
| Ludvigsson et al. (16)                                     | <ul style="list-style-type: none"> <li>Children with T1D on MDI or CSII</li> <li><math>n = 27</math></li> <li>Baseline A1C: <math>\sim 7.7\%</math></li> <li>Cross-over, 12-week arms; wore CGM for 3 days every 2 weeks</li> </ul>                                                             | A1C reduction / Medtronic CGMS                                                                                                  | A1C difference at 12 weeks during open vs. blind CGM: $\sim -0.39\%$ , $P = 0.011$                                                                                                                                        | No significant differences in hypoglycemia                                                                                                                                                                                                                                                                                                                                                        |
| Chase et al. (17)                                          | <ul style="list-style-type: none"> <li>Children with T1D</li> <li><math>n = 200</math></li> <li>Baseline A1C: 8.0%</li> <li>Parallel arms, 6 months</li> </ul>                                                                                                                                  | A1C reduction / GlucoWatch G2 Biographer                                                                                        | No significant change in A1C                                                                                                                                                                                              | Sensor use declined from 2.1 to 1.5 times/week because of skin irritation and other issues                                                                                                                                                                                                                                                                                                        |
| ADULTS WITH T2D                                            |                                                                                                                                                                                                                                                                                                 |                                                                                                                                 |                                                                                                                                                                                                                           |                                                                                                                                                                                                                                                                                                                                                                                                   |
| Beck et al. (18)                                           | <ul style="list-style-type: none"> <li>Adults with T2D on MDI</li> <li><math>n = 158</math></li> <li>Baseline A1C: 8.5%</li> <li>Parallel arms, 24 weeks</li> </ul>                                                                                                                             | A1C reduction / Dexcom G4 Platinum with an enhanced algorithm                                                                   | Adjusted mean A1C difference: $-0.3\%$ , $P = 0.022$                                                                                                                                                                      | No change in hypoglycemia                                                                                                                                                                                                                                                                                                                                                                         |
| Ehrhardt et al. (19)                                       | <ul style="list-style-type: none"> <li>Adults with T2D not on prandial insulin (half on oral medication alone)</li> <li><math>n = 100</math></li> <li>Baseline A1C: 8.2% for SMBG group, 8.4% for CGM group</li> <li>Parallel arms, 2 weeks on/1 week off, 4 cycles over 12 weeks</li> </ul>    | A1C reduction / Dexcom SEVEN                                                                                                    | Difference in A1C: $-0.6\%$ , $P = 0.002$                                                                                                                                                                                 | <ul style="list-style-type: none"> <li>Hypoglycemia data NA</li> <li>Most improvement in people who used CGM per protocol</li> </ul>                                                                                                                                                                                                                                                              |

continued on page 6

| Study                                   | Design                                                                                                                                                                                                                                                                                                                                                                                                                                          | Primary Outcome / Type of CGM                                                                                        | A1C Outcomes                                                                                                                                                                                                                | Hypoglycemia Change/Other                                                                                                                                                                                                                                                         |
|-----------------------------------------|-------------------------------------------------------------------------------------------------------------------------------------------------------------------------------------------------------------------------------------------------------------------------------------------------------------------------------------------------------------------------------------------------------------------------------------------------|----------------------------------------------------------------------------------------------------------------------|-----------------------------------------------------------------------------------------------------------------------------------------------------------------------------------------------------------------------------|-----------------------------------------------------------------------------------------------------------------------------------------------------------------------------------------------------------------------------------------------------------------------------------|
| Haak et al. (20)                        | <ul style="list-style-type: none"> <li>Adults with T2D on prandial-only insulin on MDI or CSII</li> <li><math>n = 224</math></li> <li>Baseline A1C: 8.74% in intervention group, 8.88% in control group</li> <li>Parallel arms, 2:1 randomization, 6 months</li> </ul>                                                                                                                                                                          | A1C reduction / Abbott FreeStyle Libre                                                                               | No difference in A1C overall; difference in A1C if <65 years of age, $P = 0.03$                                                                                                                                             | Time in hypoglycemia (<70 mg/dL) was reduced by 43%, $P = 0.0006$                                                                                                                                                                                                                 |
| Yoo et al. (21)                         | <ul style="list-style-type: none"> <li>Adults with T2D on oral agents or insulin</li> <li><math>n = 65</math></li> <li>Baseline A1C: 8.7% in SMBG group, 9.1% in CGM group</li> <li>Parallel arms, real-time CGM for 3 days once per month for 12 weeks</li> </ul>                                                                                                                                                                              | A1C reduction / Medtronic Guardian REAL-Time                                                                         | Improvement in A1C greater in CGM group, $\sim 0.5\%$ , $P = 0.004$ (CGM: from $9.1 \pm 1.0$ to $8.0 \pm 1.2\%$ , $P < 0.001$ ; SMBG: from $8.7 \pm 0.7$ to $8.3 \pm 1.1\%$ , $P = 0.01$ )                                  | <ul style="list-style-type: none"> <li>No significant changes in hypoglycemia</li> <li>In real-time CGM, reduced caloric intake, weight, BMI, and postprandial glucose level; increased physical activity</li> </ul>                                                              |
| ADULTS WITH T1D OR T2D                  |                                                                                                                                                                                                                                                                                                                                                                                                                                                 |                                                                                                                      |                                                                                                                                                                                                                             |                                                                                                                                                                                                                                                                                   |
| Garg et al. (22)                        | <ul style="list-style-type: none"> <li>Adults with T1D or T2D on insulin</li> <li><math>n = 91</math></li> <li>Baseline A1C: 7.6% in control group, 8.0% in CGM group</li> <li>Parallel arms, 3-day CGM for three consecutive 72-hour periods</li> </ul>                                                                                                                                                                                        | Time spent in high, low, and target glucose zones / Dexcom STS sensor                                                | <ul style="list-style-type: none"> <li>23% less time in hyperglycemia (<math>\geq 240</math> mg/dL)</li> <li>26% increase in time in range (81–140 mg/dL)</li> <li><math>P &lt; 0.001</math> for each comparison</li> </ul> | CGM group spent 21% less time in hypoglycemia (<55 mg/dL), $P < 0.0001$                                                                                                                                                                                                           |
| New et al. (23)                         | <ul style="list-style-type: none"> <li>Adults with T1D or T2D on MDI or CSII</li> <li><math>n = 160</math></li> <li>Baseline A1C: 8.2%</li> <li>Parallel arms, 100 days</li> </ul>                                                                                                                                                                                                                                                              | Time spent outside of target range / Abbott FreeStyle Navigator; 1/3 CGM with no alarm, 1/3 CGM with alarm, 1/3 SMBG | No difference in A1C or time spent outside of target range                                                                                                                                                                  | Less time in hypoglycemia range in group with alarms compared to SMBG group, $P = 0.03$                                                                                                                                                                                           |
| Cooke et al. (24)                       | <ul style="list-style-type: none"> <li>Adults with T1D or T2D treated with at least twice-daily insulin injections</li> <li><math>n = 404</math></li> <li>Baseline A1C: 9.1%</li> <li>Parallel arms, 18 months; GlucoWatch group wore device at least four times in the first 3 months and then as needed; Medtronic group wore device for 72 hours three times during first 3 months and on three more occasions thereafter</li> </ul>         | A1C reduction / GlucoWatch G2 Biographer vs. Medtronic MiniMed CGMS (blinded)                                        | No significant difference in A1C reduction                                                                                                                                                                                  | No reduction in hypoglycemia; possibly an increase                                                                                                                                                                                                                                |
| PREGNANT PATIENTS WITH T1D, T2D, OR GDM |                                                                                                                                                                                                                                                                                                                                                                                                                                                 |                                                                                                                      |                                                                                                                                                                                                                             |                                                                                                                                                                                                                                                                                   |
| Feig et al. (25)                        | <ul style="list-style-type: none"> <li>Adult women with T1D on MDI or CSII who were pregnant or planning pregnancy</li> <li><math>n = 325</math> (215 pregnant, 110 planning pregnancy)</li> <li>Baseline A1C: 6.83% in CGM group and 6.95% in control group (pregnant) and 7.57% in both CGM and control group (planning pregnancy)</li> <li>Parallel arms, to 34 weeks in pregnant women; for 24 weeks in those planning pregnancy</li> </ul> | A1C reduction / Medtronic Guardian REAL-Time or MiniMed MiniLink                                                     | A1C difference $-0.19\%$ , $P = 0.0207$ in pregnant women; no A1C difference in women planning pregnancy                                                                                                                    | <ul style="list-style-type: none"> <li>Comparable severe hypoglycemia events (18 vs. 21) and time spent hypoglycemic (3 vs. 4%)</li> <li>Neonatal health outcomes: fewer LGA babies, fewer neonatal ICU stays for &gt;24 hours, and fewer neonatal hypoglycemia events</li> </ul> |
| Secher et al. (26)                      | <ul style="list-style-type: none"> <li>Adult women with T1D or T2D who were pregnant</li> <li><math>n = 154</math></li> <li>Baseline A1C: 6.6% in CGM group, 6.8% in control group</li> <li>Parallel arms, 6 days of CGM at 8, 12, 21, 27, and 33 weeks vs. routine care</li> </ul>                                                                                                                                                             | LGA babies / Medtronic Guardian REAL-time CGM with Sof-Sensor                                                        | No difference in A1C                                                                                                                                                                                                        | <ul style="list-style-type: none"> <li>No difference in number of LGA babies</li> <li>No difference in hypoglycemia</li> </ul>                                                                                                                                                    |

| Study           | Design                                                                                                                                                                                                                                                                                                                                 | Primary Outcome / Type of CGM                          | A1C Outcomes                    | Hypoglycemia Change/Other                                                                                                                   |
|-----------------|----------------------------------------------------------------------------------------------------------------------------------------------------------------------------------------------------------------------------------------------------------------------------------------------------------------------------------------|--------------------------------------------------------|---------------------------------|---------------------------------------------------------------------------------------------------------------------------------------------|
| Wei et al. (27) | <ul style="list-style-type: none"> <li>▶ Adult women with GDM at 24–28 weeks of pregnancy</li> <li>▶ <i>n</i> = 106</li> <li>▶ Baseline A1C: 5.8% in SMBG group, 5.7% in CGM group</li> <li>▶ Parallel arms; women were asked to wear CGM intermittently early (second trimester) or late (third trimester) or perform SMBG</li> </ul> | Prenatal or obstetrical outcomes / Medtronic Gold CGMS | No significant reduction in A1C | <ul style="list-style-type: none"> <li>▶ No difference in obstetrical outcomes</li> <li>▶ Some reduction in maternal weight gain</li> </ul> |

JDRF, Juvenile Diabetes Research Foundation; LGA, large-for-gestational-age; NA, not applicable; NS, non-significant; T1D, type 1 diabetes; T2D, type 2 diabetes.

## REFERENCES

1. Beck RW, Riddlesworth T, Ruedy K, et al.; DIAMOND Study Group. Effect of continuous glucose monitoring on glycemic control in adults with type 1 diabetes using insulin injections: The DIAMOND randomized clinical trial. *JAMA* 2017;317:371–378
2. Riddlesworth T, Price D, Cohen N, Beck RW. Hypoglycemic event frequency and the effect of continuous glucose monitoring in adults with type 1 diabetes using multiple daily insulin injections. *Diabetes Ther* 2017;8:947–951
3. Lind M, Polonsky W, Hirsch IB, et al. Continuous glucose monitoring vs conventional therapy for glycemic control in adults with type 1 diabetes treated with multiple daily insulin injections: the GOLD randomized clinical trial. *JAMA* 2017;317:379–387
4. Sequeira PA, Montoya L, Ruelas V, et al. Continuous glucose monitoring pilot in low-income type 1 diabetes patients. *Diabetes Technol Ther* 2013;15:855–858
5. Tuminia A, Crimi A, Sciacca L, et al. Efficacy of real-time continuous glucose monitoring on glycaemic control and glucose variability in type 1 diabetic patients treated with either insulin pumps or multiple insulin injection therapy: a randomized controlled crossover trial. *Diabetes Metab Res Rev* 2015;31:61–68
6. Bolinder J, Antuna R, Geelhoed-Duijvestijn P, Kröger J, Weitgasser R. Novel glucose-sensing technology and hypoglycaemia in type 1 diabetes: a multicentre, non-masked, randomised controlled trial. *Lancet* 2016;388:2254–2263
7. Hermanns N, Schumann B, Kulzer B, Haak T. The impact of continuous glucose monitoring on low interstitial glucose values and low blood glucose values assessed by point-of-care blood glucose meters: results of a crossover trial. *J Diabetes Sci Technol* 2014;8:516–522
8. van Beers CA, DeVries JH, Smits MM, et al. Continuous glucose monitoring for patients with type 1 diabetes and impaired awareness of hypoglycaemia (IN CONTROL): a randomised, open-label, crossover trial. *Lancet Diabetes Endocrinol* 2016;4:893–902
9. Battelino T, Conget I, Olsen B, et al.; SWITCH Study Group. The use and efficacy of continuous glucose monitoring in type 1 diabetes treated with insulin pump therapy: a randomised controlled trial. *Diabetologia* 2012;55:3155–3162
10. Deiss D, Bolinder J, Riveline JP, et al. Improved glycemic control in poorly controlled patients with type 1 diabetes using real-time continuous glucose monitoring. *Diabetes Care* 2006;29:2730–2732
11. Juvenile Diabetes Research Foundation Continuous Glucose Monitoring Study Group. Continuous glucose monitoring and intensive treatment of type 1 diabetes. *N Engl J Med* 2008;359:1464–1476
12. O’Connell MA, Donath S, O’Neal DN, et al. Glycemic impact of patient-led use of sensor-guided pump therapy in type 1 diabetes: a randomized controlled trial. *Diabetologia* 2009;52:1250–1257
13. Juvenile Diabetes Research Foundation Continuous Glucose Monitoring Study Group. The effect of continuous glucose monitoring in well-controlled type 1 diabetes. *Diabetes Care* 2009;32:1378–1383
14. Battelino T, Phillip M, Bratina N, Nimri R, Oskarsson P, Bolinder J. Effect of continuous glucose monitoring on hypoglycemia in type 1 diabetes. *Diabetes Care* 2011;34:795–800
15. Heinemann L, Freckmann G, Ehrmann D, et al. Real-time continuous glucose monitoring in adults with type 1 diabetes and impaired hypoglycaemia awareness of severe hypoglycaemia treated with multiple daily insulin injections (HypoDE): a multicentre, randomised controlled trial. *Lancet* 2018;391:1367–1377
16. Ludvigsson J, Hanas R. Continuous subcutaneous glucose monitoring improved metabolic control in pediatric patients with type 1 diabetes: a controlled crossover study. *Pediatrics* 2003;111:933–938
17. Chase HP, Beck R, Tamborlane W, et al. A randomized multicenter trial comparing the GlucoWatch Biographer with standard glucose monitoring in children with type 1 diabetes. *Diabetes Care* 2005;28:1101–1106
18. Beck RW, Riddlesworth TD, Ruedy K, et al.; DIAMOND Study Group. Continuous glucose monitoring versus usual care in patients with type 2 diabetes receiving multiple daily insulin injections: a randomized trial. *Ann Intern Med* 2017;167:365–374
19. Ehrhardt NM, Chellappa M, Walker MS, Fonda SJ, Vigersky RA. The effect of real-time continuous glucose monitoring on glycemic control in patients with type 2 diabetes mellitus. *J Diabetes Sci Technol* 2011;5:668–675
20. Haak T, Hanaire H, Ajjan R, Hermanns N, Riveline JP, Rayman G. Flash glucose-sensing technology as a replacement for blood glucose monitoring for the management of insulin-treated type 2 diabetes: a multicenter, open-label randomized controlled trial. *Diabetes Ther* 2017;8:55–73
21. Yoo HJ, An HG, Park SY, et al. Use of a real time continuous glucose monitoring system as a motivational device for poorly controlled type 2 diabetes. *Diabetes Res Clin Pract* 2008;82:73–79
22. Garg S, Zisser H, Schwartz S, et al. Improvements in glycemic excursions with a transcutaneous, real-time continuous glucose sensor: a randomized controlled trial. *Diabetes Care* 2006;29:44–50
23. New JP, Ajjan R, Pfeiffer AF, Freckmann G. Continuous glucose monitoring in people with diabetes: the randomized controlled Glucose Level Awareness in Diabetes Study (GLADIS). *Diabet Med* 2015;32:609–617
24. Cooke D, Hurel SJ, Casbard A, et al. Randomized controlled trial to assess the impact of continuous glucose monitoring on HbA(1c) in insulin-treated diabetes (MITRE Study). *Diabet Med* 2009;26:540–547
25. Feig DS, Donovan LE, Corcoy R, et al.; CONCEPTT Collaborative Group. Continuous glucose monitoring in pregnant women with type 1 diabetes (CONCEPTT): a multi-centre international randomised controlled trial. *Lancet* 2017;390:2347–2359
26. Secher AL, Ringholm L, Andersen HU, Damm P, Mathiesen ER. The effect of real-time continuous glucose monitoring in pregnant women with diabetes: a randomized controlled trial. *Diabetes Care* 2013;36:1877–1883
27. Wei Q, Sun Z, Yang Y, Yu H, Ding H, Wang S. Effect of a CGMS and SMBG on maternal and neonatal outcomes in gestational diabetes mellitus: a randomized controlled trial. *Sci Rep* 2016;6:19920
